# Supplementary material for: Does [Tf2N]− slither? Equivalence of cation and anion self-diffusion activation volumes in 1-ethyl-3-methylimidazolium bis(trifluoromethylsulfonyl)amide
Source: Royal Society of Chemistry journal article supplement (doi:10.1039/d2cp01130a), 2022-01-01
Supplement: d2cp01130a1.pdf [file d2cp01130a1.pdf]

Supplementary Information:

Does  $[\text{Tf}_2\text{N}]^-$  Slither? Equivalence of Cation and  
Anion Self-diffusion Activation Volumes in 1-  
Ethyl-3-methylimidazolium  
Bis(trifluoromethylsulfonyl)amide.

*Kenneth R. Harris<sup>\*†</sup> and Mitsuhiro Kanakubo<sup>‡</sup>*

<sup>†</sup>School of Science, The University of New South Wales, PO Box 7916, Canberra BC, ACT  
2610, Australia

<sup>‡</sup> Research Institute for Chemical Process Technology, National Institute of Advanced  
Industrial Science and Technology (AIST), 4-2-1 Nigatake, Miyagino-ku, Sendai, Miyagi  
983-8551, Japan

Corresponding Author

\* E-mail: [k.harris@adfa.edu.au](mailto:k.harris@adfa.edu.au)

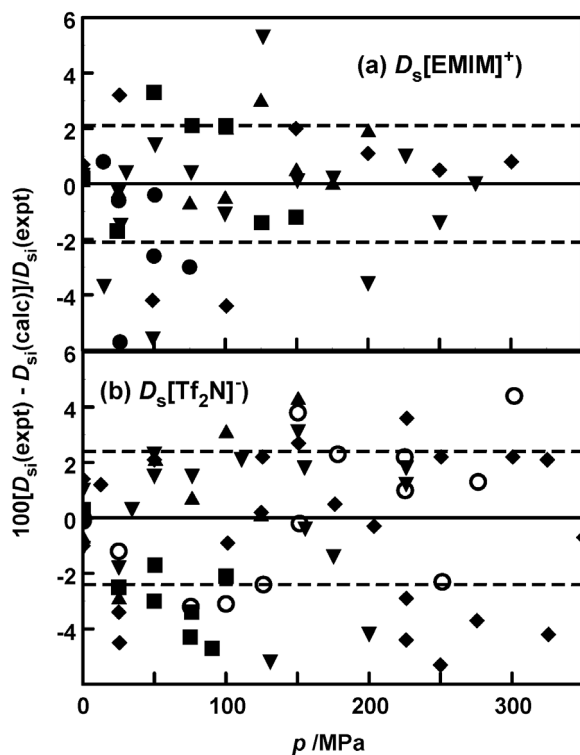

**Fig. S1.** Deviation plots for the fits of the high-pressure self-diffusion coefficients to the modified Vogel-Fulcher-Tammann equation, eqn 5: (a) cation, (b) anion. Symbols: ●, 288 K; ■, 298 K; ▲, 308 K; ▼, 323 K, ○, 338 K; ◆, 348 K. The dotted lines represent the standard deviations of the fits, 2.1 and 2.4% respectively.

**Fig. S2.** Deviation plots for the fits of the atmospheric-pressure self-diffusion coefficients to the modified Vogel-Fulcher-Tammann equation, eqn 5: (a) ●, cation, (b) ■, anion. The dotted lines represent the standard deviations of the fits, 2.1 and 2.4% respectively. N.B.: the high-pressure and atmospheric pressure data were fitted simultaneously.

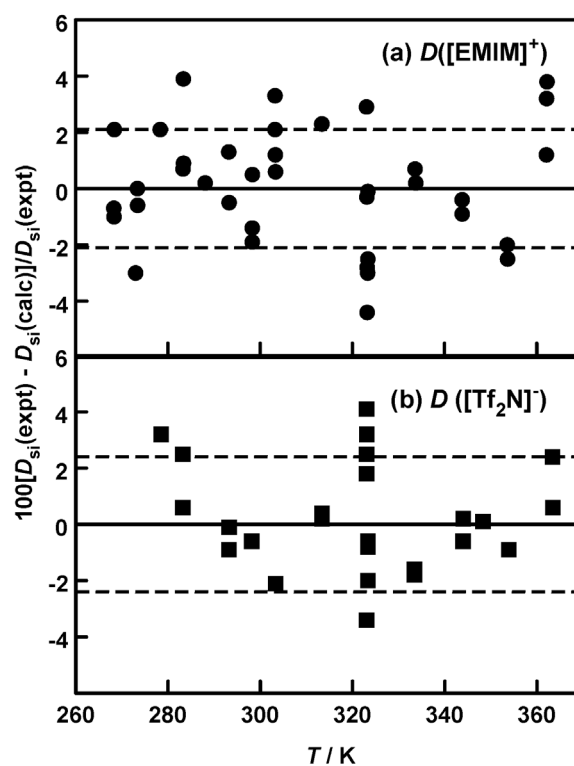

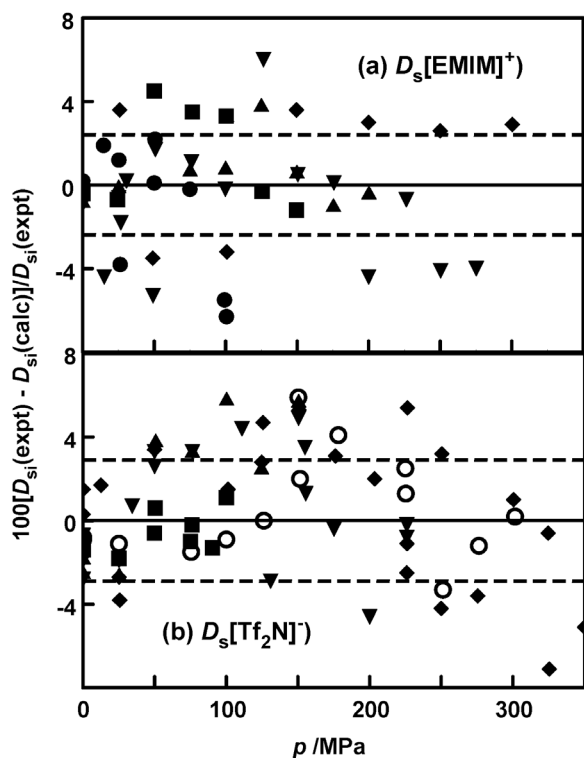

Fig. S3. Deviation plots for the density scaling fits of the high-pressure self-diffusion coefficients: (a) cation, (b) anion. Symbols: ●, 288 K; ■, 298 K; ▲, 308 K; ▼, 323 K, ○, 338 K; ◆, 348 K. The dotted lines represent the standard deviations of the fits, 2.4 and 2.9 % respectively.

Fig. S4. Deviation plots for the thermodynamic scaling fits of the atmospheric-pressure self-diffusion coefficients: (a) ●, cation, (b) ■, anion. The dotted lines represent the standard deviations of the fits, 2.4 and 2.9% respectively. N.B.: the high-pressure and atmospheric pressure data were fitted simultaneously.

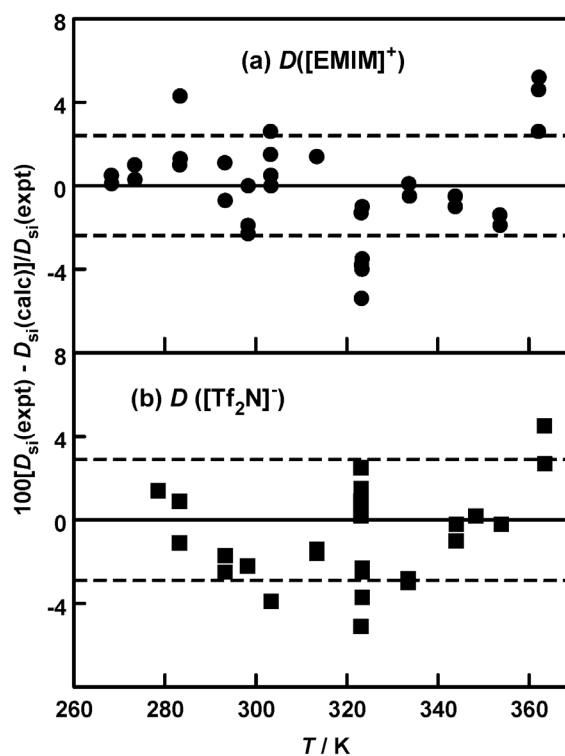

**Table S1.** Experimental Cation Self-Diffusion Coefficients  $D_{S^+}$  of [EMIM][Tf<sub>2</sub>N] from  $T = (268 \text{ to } 362)$  K at Pressures  $p = (0.1 \text{ to } 351)$  MPa together with Calculated Densities  $\rho$  and Molar Volumes  $V$ .<sup>a</sup>

| $T/K$                                 | $p/\text{MPa}$ | $\rho/\text{g}\cdot\text{cm}^{-3}$ | $V/\text{cm}^3\cdot\text{mol}^{-1}$ | $10^{12} D_{S^+}/\text{m}^2 \text{ s}^{-1}$ | $T/K$                             | $p/\text{MPa}$ | $\rho/\text{g}\cdot\text{cm}^{-3}$ | $V/\text{cm}^3\cdot\text{mol}^{-1}$ | $10^{12} D_{S^+}/\text{m}^2 \text{ s}^{-1}$ |
|---------------------------------------|----------------|------------------------------------|-------------------------------------|---------------------------------------------|-----------------------------------|----------------|------------------------------------|-------------------------------------|---------------------------------------------|
| Atm p probe measurements <sup>a</sup> |                |                                    |                                     |                                             | High pressure vessel measurements |                |                                    |                                     |                                             |
| <b>268.27</b>                         | <b>0.1</b>     | <b>1.54972</b>                     | <b>252.50</b>                       | <b>13.95</b>                                | 288.19                            | 75.0           | 1.57607                            | 248.28                              | 17.13                                       |
| <b>268.30</b>                         | <b>0.1</b>     | <b>1.54969</b>                     | <b>252.51</b>                       | <b>13.92</b>                                | 298.33                            | 0.10           | 1.51884                            | 257.64                              | 52.57                                       |
| <b>273.39</b>                         | <b>0.1</b>     | <b>1.54440</b>                     | <b>253.37</b>                       | <b>18.28</b>                                | 298.33                            | 0.10           | 1.51884                            | 257.64                              | 52.57                                       |
| <b>273.45</b>                         | <b>0.1</b>     | <b>1.54435</b>                     | <b>253.38</b>                       | <b>18.21</b>                                | 298.34                            | 24.3           | 1.53598                            | 254.76                              | 41.63                                       |
| <b>283.29</b>                         | <b>0.1</b>     | <b>1.53419</b>                     | <b>255.06</b>                       | <b>29.13</b>                                | 298.33                            | 50.0           | 1.55248                            | 252.06                              | 34.95                                       |
| <b>283.35</b>                         | <b>0.1</b>     | <b>1.53413</b>                     | <b>255.07</b>                       | <b>30.20</b>                                | 298.34                            | 76.7           | 1.56801                            | 249.56                              | 27.49                                       |
| <b>283.39</b>                         | <b>0.1</b>     | <b>1.53410</b>                     | <b>255.08</b>                       | <b>29.32</b>                                | 298.37                            | 100.3          | 1.58059                            | 247.57                              | 22.59                                       |
| <b>293.22</b>                         | <b>0.1</b>     | <b>1.52404</b>                     | <b>256.76</b>                       | <b>43.98</b>                                | 298.35                            | 125.5          | 1.59297                            | 245.65                              | 17.73                                       |
| <b>293.29</b>                         | <b>0.1</b>     | <b>1.52397</b>                     | <b>256.77</b>                       | <b>43.30</b>                                | 298.36                            | 149.5          | 1.60382                            | 243.99                              | 14.65                                       |
| <b>298.30</b>                         | <b>0.1</b>     | <b>1.51887</b>                     | <b>257.63</b>                       | <b>51.48</b>                                | 308.04                            | 0.1            | 1.50903                            | 259.31                              | 73.27                                       |
| <b>298.31</b>                         | <b>0.1</b>     | <b>1.51886</b>                     | <b>257.63</b>                       | <b>51.71</b>                                | 308.19                            | 0.1            | 1.50888                            | 259.34                              | 73.62                                       |
| <b>298.32</b>                         | <b>0.1</b>     | <b>1.51885</b>                     | <b>257.64</b>                       | <b>52.74</b>                                | 308.24                            | 0.1            | 1.50883                            | 259.35                              | 73.66                                       |
| <b>303.22</b>                         | <b>0.1</b>     | <b>1.51390</b>                     | <b>258.48</b>                       | <b>63.67</b>                                | 308.20                            | 25.2           | 1.52699                            | 256.26                              | 59.40                                       |
| <b>303.25</b>                         | <b>0.1</b>     | <b>1.51387</b>                     | <b>258.48</b>                       | <b>64.50</b>                                | 308.30                            | 75.1           | 1.55841                            | 251.10                              | 39.62                                       |
| <b>303.31</b>                         | <b>0.1</b>     | <b>1.51380</b>                     | <b>258.50</b>                       | <b>63.24</b>                                | 308.31                            | 100.0          | 1.57216                            | 248.90                              | 32.66                                       |
| <b>303.34</b>                         | <b>0.1</b>     | <b>1.51377</b>                     | <b>258.50</b>                       | <b>62.97</b>                                | 308.17                            | 100.6          | 1.57260                            | 248.83                              | 33.16                                       |
| <b>313.38</b>                         | <b>0.1</b>     | <b>1.50367</b>                     | <b>260.24</b>                       | <b>88.50</b>                                | 308.31                            | 125.0          | 1.58490                            | 246.90                              | 27.91                                       |
| <b>313.40</b>                         | <b>0.1</b>     | <b>1.50365</b>                     | <b>260.24</b>                       | <b>88.57</b>                                | 308.32                            | 149.8          | 1.59655                            | 245.10                              | 22.60                                       |
| <b>323.16</b>                         | <b>0.1</b>     | <b>1.49392</b>                     | <b>261.94</b>                       | <b>114.4</b>                                | 308.30                            | 175.3          | 1.60771                            | 243.40                              | 18.62                                       |
| <b>323.22</b>                         | <b>0.1</b>     | <b>1.49386</b>                     | <b>261.95</b>                       | <b>110.0</b>                                | 308.31                            | 200.2          | 1.61782                            | 241.88                              | 15.88                                       |
| <b>323.24</b>                         | <b>0.1</b>     | <b>1.49384</b>                     | <b>261.95</b>                       | <b>111.8</b>                                | 322.88                            | 0.1            | 1.49420                            | 261.89                              | 114.2                                       |

|                                   |            |                |               |              |        |       |         |        |       |
|-----------------------------------|------------|----------------|---------------|--------------|--------|-------|---------|--------|-------|
| <b>323.33</b>                     | <b>0.1</b> | <b>1.49375</b> | <b>261.97</b> | <b>111.9</b> | 323.19 | 0.1   | 1.49389 | 261.94 | 115.2 |
| <b>323.35</b>                     | <b>0.1</b> | <b>1.49373</b> | <b>261.97</b> | <b>115.2</b> | 323.20 | 15.0  | 1.50523 | 259.97 | 98.77 |
| <b>323.37</b>                     | <b>0.1</b> | <b>1.49371</b> | <b>261.97</b> | <b>112.5</b> | 323.18 | 25.2  | 1.51265 | 258.69 | 94.45 |
| <b>333.60</b>                     | <b>0.1</b> | <b>1.48359</b> | <b>263.76</b> | <b>151.7</b> | 323.18 | 26.7  | 1.51373 | 258.51 | 92.29 |
| <b>333.74</b>                     | <b>0.1</b> | <b>1.48346</b> | <b>263.78</b> | <b>151.4</b> | 323.21 | 30.5  | 1.51639 | 258.05 | 91.45 |
| <b>343.80</b>                     | <b>0.1</b> | <b>1.47359</b> | <b>265.55</b> | <b>189.8</b> | 323.17 | 49.2  | 1.52913 | 255.90 | 74.93 |
| <b>343.81</b>                     | <b>0.1</b> | <b>1.47358</b> | <b>265.55</b> | <b>190.8</b> | 323.13 | 50.8  | 1.53018 | 255.73 | 79.22 |
| <b>353.61</b>                     | <b>0.1</b> | <b>1.46406</b> | <b>267.28</b> | <b>231.6</b> | 323.18 | 76.0  | 1.54596 | 253.12 | 65.33 |
| <b>353.65</b>                     | <b>0.1</b> | <b>1.46402</b> | <b>267.29</b> | <b>230.7</b> | 323.21 | 99.8  | 1.55977 | 250.88 | 54.29 |
| <b>362.09</b>                     | <b>0.1</b> | <b>1.45588</b> | <b>268.78</b> | <b>282.9</b> | 323.19 | 126.4 | 1.57407 | 248.60 | 48.06 |
| <b>362.12</b>                     | <b>0.1</b> | <b>1.45585</b> | <b>268.79</b> | <b>289.0</b> | 323.22 | 150.5 | 1.58599 | 246.73 | 38.65 |
| <b>362.23</b>                     | <b>0.1</b> | <b>1.45575</b> | <b>268.80</b> | <b>291.4</b> | 323.18 | 175.7 | 1.59771 | 244.92 | 32.63 |
| 268.40                            | 0.1        | 1.54958        | 252.53        | 14.44        | 323.23 | 200.0 | 1.60818 | 243.33 | 26.85 |
| 273.01                            | 0.1        | 1.54480        | 253.31        | 17.41        | 323.18 | 226.3 | 1.61883 | 241.72 | 23.71 |
| 278.33                            | 0.1        | 1.53930        | 254.21        | 23.65        | 323.24 | 250.2 | 1.62784 | 240.39 | 19.99 |
| 288.09                            | 0.1        | 1.52927        | 255.88        | 35.50        | 323.17 | 275.2 | 1.63675 | 239.08 | 17.35 |
| 323.07                            | 0.1        | 1.49401        | 261.92        | 117.8        | 348.14 | 0.1   | 1.46937 | 266.31 | 212.1 |
| High pressure vessel measurements |            |                |               |              | 348.15 | 0.1   | 1.46936 | 266.31 | 212.1 |
| 288.18                            | 0.1        | 1.52918        | 255.90        | 35.61        | 348.14 | 25.9  | 1.48963 | 262.69 | 183.3 |
| 288.21                            | 0.1        | 1.52915        | 255.90        | 35.66        | 348.13 | 49.0  | 1.50646 | 259.76 | 146.5 |
| 288.23                            | 0.1        | 1.52913        | 255.90        | 35.69        | 348.14 | 100.8 | 1.54015 | 254.07 | 105.4 |
| 288.23                            | 14.6       | 1.53935        | 254.21        | 31.26        | 348.17 | 149.5 | 1.56767 | 249.61 | 83.79 |
| 288.23                            | 25.3       | 1.54651        | 253.03        | 27.84        | 348.17 | 200.0 | 1.59269 | 245.69 | 62.09 |
| 288.18                            | 26.2       | 1.54714        | 252.93        | 26.22        | 348.13 | 250.0 | 1.61461 | 242.36 | 46.86 |
| 288.23                            | 50.0       | 1.56189        | 250.54        | 21.68        | 348.14 | 300.4 | 1.63424 | 239.45 | 36.14 |
| 288.22                            | 50.6       | 1.56225        | 250.48        | 22.01        | 348.15 | 351.2 | 1.65193 | 236.88 | 27.58 |

<sup>a</sup> Entries in bold for 0.1 MPa have been reported previously.<sup>1</sup> Entries in normal type are new check measurements on the sealed NMR tube sample.

**Table S2.** Experimental Anion Self-Diffusion Coefficients  $D_s$  of [EMIM][Tf<sub>2</sub>N] from  $T = (278 \text{ to } 363) \text{ K}$  at Pressures  $p = (0.1 \text{ to } 353) \text{ MPa}$  together with Calculated Densities  $\rho$  and Molar Volumes  $V$ .<sup>a</sup>

| $T/\text{K}$                          | $p/\text{MPa}$ | $\rho/\text{g}\cdot\text{cm}^{-3}$ | $V/\text{cm}^3\cdot\text{mol}^{-1}$ | $10^{12} D_s/\text{m}^2 \text{ s}^{-1}$ | $T/\text{K}$                      | $p/\text{MPa}$ | $\rho/\text{g}\cdot\text{cm}^{-3}$ | $V/\text{cm}^3\cdot\text{mol}^{-1}$ | $10^{12} D_s/\text{m}^2 \text{ s}^{-1}$ |
|---------------------------------------|----------------|------------------------------------|-------------------------------------|-----------------------------------------|-----------------------------------|----------------|------------------------------------|-------------------------------------|-----------------------------------------|
| Atm p probe measurements <sup>a</sup> |                |                                    |                                     |                                         | High pressure vessel measurements |                |                                    |                                     |                                         |
| <b>283.17</b>                         | <b>0.1</b>     | <b>1.53432</b>                     | <b>255.04</b>                       | <b>16.50</b>                            | 323.21                            | 76.3           | 253.09                             | 1.54615                             | 40.41                                   |
| <b>283.19</b>                         | <b>0.1</b>     | <b>1.53429</b>                     | <b>255.04</b>                       | <b>16.20</b>                            | 323.16                            | 111.0          | 249.89                             | 1.56596                             | 31.47                                   |
| <b>293.21</b>                         | <b>0.1</b>     | <b>1.52404</b>                     | <b>256.76</b>                       | <b>24.97</b>                            | 323.14                            | 131.0          | 248.22                             | 1.57645                             | 25.28                                   |
| <b>293.23</b>                         | <b>0.1</b>     | <b>1.52402</b>                     | <b>256.76</b>                       | <b>25.20</b>                            | 323.09                            | 150.4          | 246.72                             | 1.58606                             | 23.80                                   |
| <b>298.15</b>                         | <b>0.1</b>     | <b>1.51903</b>                     | <b>257.61</b>                       | <b>30.53</b>                            | 323.20                            | 155.0          | 246.39                             | 1.58818                             | 22.80                                   |
| <b>303.33</b>                         | <b>0.1</b>     | <b>1.51378</b>                     | <b>258.50</b>                       | <b>36.49</b>                            | 323.13                            | 155.4          | 246.36                             | 1.58840                             | 22.17                                   |
| <b>313.37</b>                         | <b>0.1</b>     | <b>1.50368</b>                     | <b>260.24</b>                       | <b>52.35</b>                            | 323.10                            | 175.2          | 244.95                             | 1.59752                             | 19.01                                   |
| <b>313.41</b>                         | <b>0.1</b>     | <b>1.50364</b>                     | <b>260.24</b>                       | <b>52.55</b>                            | 323.11                            | 200.1          | 243.31                             | 1.60828                             | 15.46                                   |
| <b>323.03</b>                         | <b>0.1</b>     | <b>1.49405</b>                     | <b>261.91</b>                       | <b>71.00</b>                            | 323.11                            | 226.0          | 241.74                             | 1.61875                             | 13.63                                   |
| <b>323.03</b>                         | <b>0.1</b>     | <b>1.49405</b>                     | <b>261.91</b>                       | <b>72.68</b>                            | 323.13                            | 226.0          | 241.74                             | 1.61874                             | 13.56                                   |
| <b>323.05</b>                         | <b>0.1</b>     | <b>1.49402</b>                     | <b>261.92</b>                       | <b>67.49</b>                            | 338.14                            | 0.1            | 264.55                             | 1.47913                             | 103.0                                   |
| <b>323.07</b>                         | <b>0.1</b>     | <b>1.49401</b>                     | <b>261.92</b>                       | <b>71.58</b>                            | 338.15                            | 0.1            | 264.56                             | 1.47912                             | 102.9                                   |
| <b>323.31</b>                         | <b>0.1</b>     | <b>1.49377</b>                     | <b>261.96</b>                       | <b>69.69</b>                            | 338.28                            | 0.1            | 264.58                             | 1.47899                             | 103.4                                   |
| <b>323.32</b>                         | <b>0.1</b>     | <b>1.49375</b>                     | <b>261.96</b>                       | <b>68.89</b>                            | 338.19                            | 25.0           | 261.17                             | 1.49829                             | 86.20                                   |
| <b>323.35</b>                         | <b>0.1</b>     | <b>1.49373</b>                     | <b>261.97</b>                       | <b>69.91</b>                            | 338.25                            | 75.4           | 255.31                             | 1.53268                             | 60.54                                   |
| <b>333.41</b>                         | <b>0.1</b>     | <b>1.48378</b>                     | <b>263.73</b>                       | <b>90.40</b>                            | 338.25                            | 100.0          | 252.84                             | 1.54764                             | 51.52                                   |
| <b>333.42</b>                         | <b>0.1</b>     | <b>1.48376</b>                     | <b>263.73</b>                       | <b>90.22</b>                            | 338.23                            | 126.2          | 250.45                             | 1.56245                             | 43.64                                   |
| <b>343.98</b>                         | <b>0.1</b>     | <b>1.47342</b>                     | <b>265.58</b>                       | <b>117.1</b>                            | 338.24                            | 150.3          | 248.44                             | 1.57509                             | 39.68                                   |
| <b>344.04</b>                         | <b>0.1</b>     | <b>1.47336</b>                     | <b>265.59</b>                       | <b>118.2</b>                            | 338.24                            | 151.4          | 248.35                             | 1.57566                             | 37.81                                   |
| <b>353.90</b>                         | <b>0.1</b>     | <b>1.46378</b>                     | <b>267.33</b>                       | <b>144.0</b>                            | 338.24                            | 178.2          | 246.30                             | 1.58876                             | 32.59                                   |
| <b>353.92</b>                         | <b>0.1</b>     | <b>1.46376</b>                     | <b>267.33</b>                       | <b>144.1</b>                            | 338.32                            | 225.0          | 243.12                             | 1.60955                             | 24.11                                   |

|                                   |            |                |               |              |        |       |        |         |       |
|-----------------------------------|------------|----------------|---------------|--------------|--------|-------|--------|---------|-------|
| <b>363.38</b>                     | <b>0.1</b> | <b>1.45464</b> | <b>269.01</b> | <b>178.7</b> | 338.27 | 225.3 | 243.10 | 1.60968 | 23.74 |
| <b>363.43</b>                     | <b>0.1</b> | <b>1.45460</b> | <b>269.02</b> | <b>175.7</b> | 338.32 | 251.3 | 241.52 | 1.62021 | 19.49 |
| 278.52                            | 0.1        | 1.53911        | 254.25        | 13.18        | 338.29 | 276.3 | 240.10 | 1.62977 | 17.20 |
| 323.12                            | 0.1        | 1.49395        | 261.93        | 72.18        | 338.31 | 301.6 | 238.77 | 1.63886 | 15.14 |
| High pressure vessel measurements |            |                |               |              | 348.22 | 0.1   | 266.33 | 1.46929 | 131.0 |
| 298.04                            | 0.1        | 257.59         | 1.51914       | 30.64        | 348.27 | 0.1   | 266.34 | 1.46924 | 129.6 |
| 298.04                            | 0.1        | 257.59         | 1.51913       | 30.64        | 348.30 | 0.1   | 266.34 | 1.46921 | 129.6 |
| 298.47                            | 0.1        | 257.66         | 1.51870       | 31.15        | 348.32 | 0.1   | 266.34 | 1.46919 | 128.1 |
| 298.05                            | 25.1       | 254.63         | 1.53678       | 23.78        | 348.24 | 12.5  | 264.54 | 1.47922 | 121.1 |
| 298.23                            | 49.8       | 252.06         | 1.55245       | 19.10        | 348.28 | 25.1  | 262.82 | 1.48892 | 106.9 |
| 298.06                            | 50.4       | 251.98         | 1.55296       | 19.09        | 348.20 | 25.6  | 262.74 | 1.48936 | 105.3 |
| 298.23                            | 75.0       | 249.69         | 1.56719       | 15.04        | 348.26 | 50.0  | 259.65 | 1.50704 | 96.67 |
| 298.03                            | 76.0       | 249.57         | 1.56792       | 14.90        | 348.16 | 101.3 | 254.02 | 1.54046 | 68.10 |
| 298.04                            | 90.3       | 248.35         | 1.57566       | 12.96        | 348.22 | 124.7 | 251.80 | 1.55405 | 59.72 |
| 298.22                            | 100.0      | 247.58         | 1.58056       | 12.29        | 348.22 | 125.6 | 251.72 | 1.55454 | 60.59 |
| 308.35                            | 0.1        | 259.36         | 1.50874       | 44.05        | 348.23 | 150.8 | 249.52 | 1.56827 | 52.20 |
| 308.33                            | 0.1        | 259.37         | 1.50872       | 44.32        | 348.16 | 176.2 | 247.46 | 1.58130 | 43.67 |
| 308.36                            | 25.3       | 256.27         | 1.52694       | 34.95        | 348.16 | 203.6 | 245.44 | 1.59434 | 36.69 |
| 308.36                            | 50.7       | 253.50         | 1.54364       | 29.77        | 348.20 | 226.0 | 243.90 | 1.60438 | 30.84 |
| 308.33                            | 76.4       | 250.98         | 1.55911       | 23.70        | 348.23 | 226.1 | 243.90 | 1.60440 | 31.29 |
| 308.33                            | 100.3      | 248.88         | 1.57230       | 19.95        | 348.18 | 226.5 | 243.87 | 1.60462 | 33.29 |
| 308.33                            | 124.6      | 246.93         | 1.58469       | 15.86        | 348.21 | 250.0 | 242.36 | 1.61457 | 26.47 |
| 308.33                            | 150.6      | 245.04         | 1.59692       | 13.41        | 348.17 | 250.5 | 242.33 | 1.61479 | 28.40 |
| 323.06                            | 0.1        | 261.92         | 1.49402       | 70.46        | 348.15 | 275.5 | 240.83 | 1.62482 | 23.06 |
| 323.16                            | 0.1        | 261.94         | 1.49392       | 69.19        | 348.16 | 300.5 | 239.44 | 1.63427 | 21.08 |
| 323.37                            | 0.1        | 261.97         | 1.49371       | 70.23        | 348.14 | 324.6 | 238.18 | 1.64290 | 18.25 |
| 323.19                            | 25.2       | 258.69         | 1.51266       | 57.05        | 348.16 | 325.4 | 238.14 | 1.64318 | 17.07 |

|        |      |        |         |       |        |       |        |         |       |
|--------|------|--------|---------|-------|--------|-------|--------|---------|-------|
| 323.38 | 34.4 | 257.62 | 1.51894 | 54.74 | 348.15 | 350.0 | 236.94 | 1.65155 | 15.30 |
| 323.07 | 50.0 | 255.80 | 1.52974 | 49.17 | 348.16 | 353.1 | 236.79 | 1.65255 | 14.73 |
| 323.25 | 50.0 | 255.83 | 1.52958 | 49.26 |        |       |        |         |       |

<sup>a</sup> Entries in bold for 0.1 MPa have been reported previously.<sup>1</sup> Entries in normal type are new check measurements on the sealed NMR tube sample.

## Reference

---

<sup>1</sup> K. R. Harris and M. Kanakubo, *Phys. Chem. Chem. Phys.*, 2015, **17**, 23977-23993.
